# Supplementary material
Source: HighWire-hosted journal article supplement (https://www.cmajopen.ca/highwire/filestream/84074/field_highwire_adjunct_files/1/2020-0063-original-submission.pdf)
Supplement: 2020-0063-original-submission.pdf [file 2020-0063-original-submission.pdf]

## Can nurse home visiting reduce prenatal substance use in a cohort coping with socioeconomic disadvantage? Randomized controlled trial findings in British Columbia

Nicole LA Catherine, MSc, PhD<sup>1</sup>

Michael Boyle, MSW, PhD<sup>2</sup>

Yufei Zheng, MA, MPH<sup>1</sup>

Lawrence McCandless, MSc, PhD<sup>3</sup>

Hui Xie, MS, PhD<sup>3,4</sup>

Rosemary Lever, MA<sup>1</sup>

Debbie Sheehan, RN, MSW<sup>1</sup>

Andrea Gonzalez, MA, PhD<sup>2</sup>

Susan Jack, RN, PhD<sup>5</sup>

Amiram Gafni, MA, PhD<sup>6</sup>

Lil Tonmyr, MSW, PhD<sup>7</sup>

Lenora Marcellus, RN, PhD<sup>8</sup>

Colleen Varcoe, RN, PhD<sup>9</sup>

Ange Cullen, MPH<sup>1</sup>

Kathleen Hjertaas, BES<sup>1</sup>

Caitlin Riebe, BSc<sup>1</sup>

Nikolina Rikert, BA<sup>1</sup>

Ashvini Sunthoram, BSc<sup>1</sup>

Ronald Barr, MA, MDCM<sup>10</sup>

Harriet MacMillan, CM, MD<sup>2</sup>

Charlotte Waddell, MSc, MD<sup>1\*</sup>

1 Children's Health Policy Centre, Faculty of Health Sciences, Simon Fraser University

2 Offord Centre for Child Studies, Faculty of Health Sciences, McMaster University

3 Faculty of Health Sciences, Simon Fraser University

4 Arthritis Research Canada

5 School of Nursing, Faculty of Health Sciences, McMaster University

6 Department of Health Research Methods, Evaluation and Implementation, Faculty of Health Sciences, McMaster University

7 Public Health Agency of Canada

8 School of Nursing, University of Victoria

9 School of Nursing, University of British Columbia

10 Department of Pediatrics, Faculty of Medicine, University of British Columbia

\* Corresponding author: [charlotte\\_waddell@sfu.ca](mailto:charlotte_waddell@sfu.ca)

1  
2  
3 Funding statement: This trial is funded by the British Columbia Ministry of Health with  
4 support from the British Columbia Ministry of Children and Family  
5 Development (Grant Number XLP0764X01 September 1, 2011 through  
6 March 31, 2022). British Columbia's Fraser, Interior, Island and  
7 Vancouver Coastal Health Authorities funded the delivery of the Nurse-  
8 Family Partnership intervention. The Djavad Mowafaghian and R. and J.  
9 Stern Family Foundations have provided additional generous supports.  
10 The opinions, results and conclusions reported in this paper are those of  
11 the authors and are independent from the funding sources. The funders  
12 were not involved in the study design; in the collection, analysis and  
13 interpretation of data; in the writing of the report; and in the decision to  
14 submit the article for publication.  
15  
16  
17  
18  
19  
20  
21  
22  
23  
24  
25  
26  
27  
28  
29

30 Declarations: All authors declare they have no competing interests.  
31  
32

33 Trial Registration: ClinicalTrials.gov, NCT01672060.  
34

35 Key words: Mental health, vulnerable populations, prevention services  
36  
37  
38  
39  
40  
41  
42  
43  
44  
45  
46  
47  
48  
49  
50  
51  
52  
53  
54  
55  
56  
57  
58  
59  
60

**Abstract (250/ 250 words)**

**Background:** We are evaluating the Nurse-Family Partnership (NFP) program regarding its effectiveness in improving child and maternal outcomes, and report here on reducing prenatal substance use.

**Methods:** We are conducting this randomized controlled trial in British Columbia with 739 participants (14–24 years) who are experiencing socioeconomic disadvantage and parenting for the first time. Participants were randomly allocated (1:1) to intervention (n=368) or comparison (n=371) groups. Public-health nurses delivered NFP during frequent home visits starting before 28 weeks gestation and continuing until children reached age two years. The pre-specified prenatal outcome indicators were changes in nicotine/cigarette and alcohol use by late pregnancy. Exploratory cannabis and street drug use data were also analyzed.

**Results:** All 739 participants were included in intention-to-treat analyses. By late pregnancy, we observed decreased rates of prenatal cigarette (difference in changes [DIC] of proportions -3.2%, 95% confidence interval [CI] -7.3%~ 1.57%) and alcohol (DIC -0.5%, 95% CI -4.2%~ 3.2%) use for NFP participants but decreases were not significant. In smokers, however, we found a significant reduction in daily cigarette smoking (DIC [count] -1.78, 95% CI -3.0~ 0.32). NFP also significantly reduced rates of prenatal cannabis use (DIC -5.4%, 95% CI -10.9%~ -1.2%), but not rates of street drug use or “any” substance use.

**Interpretation:** We found no evidence that NFP was effective in reducing rates of prenatal cigarette and alcohol use in a cohort experiencing socioeconomic disadvantage. However, NFP reduced prenatal cigarette use for smokers, and reduced prenatal cannabis use, a growing public health problem in Canada.

## Introduction

Prenatal exposure to substances such as nicotine/cigarettes (hereafter cigarettes), alcohol, cannabis, cocaine and opioids put children at risk for adverse outcomes including preterm birth, low birth weight, early motor abnormalities, mental health problems and cognitive impairments.<sup>1-10</sup> Canadian rates of prenatal substance use nevertheless remain concerning, particularly for cigarettes (11–23%), alcohol (10–15%) and cannabis (2–7%).<sup>11-15</sup> Cannabis use is also predicted to increase following recent legalization in Canada.<sup>15,16</sup> Accordingly, preventing prenatal substance use is strongly warranted<sup>17,18</sup> — particularly with those who are young, living on low income and coping with mental health concerns and therefore at higher risk of using substances prenatally.<sup>12,19</sup>

Aiming to improve child and maternal wellbeing, Nurse-Family Partnership (NFP) involves public-health nurses (PHNs) providing intensive home visits to girls and young women who are experiencing socioeconomic disadvantage and preparing to parent for the first time.<sup>20</sup> Randomized controlled trials (RCTs) in the United States (US) have shown that NFP improves child mental health and cognitive development and reduces child injuries by age two years, while also improving maternal wellbeing.<sup>20</sup> Yet evidence has been mixed on NFP's effectiveness in reducing prenatal substance use, particularly outside the US.<sup>21,22</sup> As well, it is not known how NFP's benefits may translate to Canada, given the greater availability of publicly-funded health and social services compared to the US.

To address this evidence gap, we launched the British Columbia Healthy Connections Project (BCHCP) RCT in 2013.<sup>23,24</sup> Here we report data from this RCT on NFP's impact on prenatal cigarette and alcohol use (pre-specified outcome indicators). We also report exploratory

1  
2  
3 data on program effects for prenatal cannabis and street drug use. The trial is still in progress.  
4  
5 Future reports will provide data on additional child and maternal outcomes.  
6  
7

## 8 **Methods**

### 9 **Design, setting and population**

10 The BCHCP is a single-blind RCT being conducted across 26 urban-suburban local health areas  
11 (LHAs) in four BC regional health authorities (HAs). The trial was registered in 2012 with  
12 ClinicalTrials.gov (NCT01672060). The HAs obtained trial referrals from primary-care  
13 providers and community agencies and passed these to the study team, who contacted potential  
14 participants to introduce the RCT, confirm eligibility and schedule baseline interviews. (See  
15 Table 1).  
16  
17  
18  
19  
20  
21  
22  
23  
24  
25  
26  
27  
28  
29  
30  
31  
32  
33  
34  
35  
36  
37  
38  
39  
40  
41  
42  
43  
44  
45  
46  
47  
48  
49  
50  
51  
52  
53  
54  
55  
56  
57  
58  
59  
60

[Insert Table 1]

**Table 1. Inclusion and exclusion criteria at time of baseline interview****Inclusion criteria**

1. Age 24 years or younger
2. Preparing to parent for the first time<sup>a</sup>
3. Less than 28 weeks gestation<sup>b</sup>
4. Competent to provide informed consent, including conversational in English<sup>c</sup>
5. Experiencing socioeconomic disadvantage
  - Age 19 years or younger
  - Age 20–24 years and meets 2 of 3 indicators: a) lone parent<sup>d</sup>; b) less than grade 12<sup>e</sup>; c) low income (one or more of the following):
    - i. Receiving income assistance
    - ii Finding it very difficult to live on total household income regarding food or rent
    - iii. Homeless, defined as living on the streets, in an emergency or homeless shelter, staying in places not meant as residences, e.g., car or tent, or experiencing “hidden homelessness” such as “couch surfing”

**Exclusion criteria**

1. Planning to have the child adopted
2. Planning to leave the catchment area for 3 months or longer during the trial<sup>f</sup>

Notes: <sup>a</sup> Eligible if a previous pregnancy ended in termination, miscarriage or stillbirth or if previous parenting involved step-parenting only; <sup>b</sup> must receive first NFP visit by end of 28th week of gestation, according to Nurse-Family Partnership fidelity requirements; <sup>c</sup> must be able to participate without an interpreter; <sup>d</sup> not married or living with the same partner for one year or more consecutively; <sup>e</sup> did not complete secondary school or did not receive secondary school equivalency certificate; <sup>f</sup> catchment refers to designated BC Local Health Areas offering the BCHCP; table adapted from Catherine et al., 2016<sup>23</sup> and 2019<sup>24</sup>.

### **Randomization procedures**

Following completion of baseline interviews, participants were randomly assigned (1:1) to either intervention (NFP plus existing services) or comparison (existing services) groups. We used an unpredictable, randomized sequence protocol developed by an independent statistician. We applied a separate schedule using a blocked randomization scheme for each of the 26 LHAs using two block sizes: when 18 or fewer participants were expected annually, and when 19 or more were expected. A senior study team member, uninvolved in data collection, performed computerized allocation and informed participants and NFP PHNs of treatment allocation (i.e., they were not masked). Field interviewers involved in data collection and data preparation were masked to group allocation; they also reminded participants prior to each interview not to reveal their group. The main analyses were conducted by trial statisticians/methodologists masked to group assignment.

### **Intervention**

Following enrollment, NFP PHNs contacted participants allocated to the intervention group to schedule the first home visit before 28 weeks gestation. PHNs delivered NFP during regular 60–90-minute home visits throughout the pregnancy then through until children reached age two years, totalling as many as 60 or more visits of varying intensity over 2.5 years. Through skill development and motivational interviewing, PHNs assisted girls and young women in identifying individual goals and plans for behavioural change, such as reducing prenatal substance use. PHNs had access to NFP program materials focused on prenatal substance use to facilitate this process. PHNs also received intensive NFP education and were supervised to ensure fidelity to core program elements.<sup>25</sup>

### **Existing services**

All participants (NFP and comparison) were entitled to receive existing health and social services within their HAs. Prenatally these could include: primary and/or specialist healthcare; hospital and/or emergency room services; public health services including outreach and prenatal classes; and social services and community programs.

### **Data sources**

All eligible participants provided written informed consent before starting the study. An array of validated scales and items were then administered at baseline (before 28 weeks gestation; in person) and in late pregnancy (34–36 weeks gestation; by telephone). (Table 2 summarizes the prenatal measures used.) Following each interview, participants received gift cards (\$50–75 CAD) for local stores. Field interviewers verbally administered questionnaire items to ensure accuracy. For items prone to response bias (including prenatal substance use), in-person interview questions were administered using private audio-recordings, with participants responding confidentially on paper; responses were then placed in sealed envelopes for processing by the study team. Participants could decline to answer questions. In-person interview settings were chosen by participants and usually involved their homes.

[Insert Table 2]



**Table 2. Summary of measures in early and late pregnancy**

| Measurement Construct & Description                                                                                                                                                                                                                                                                                                                                                                                                                                                                                       | Scoring                                                                                                                                                                    |
|---------------------------------------------------------------------------------------------------------------------------------------------------------------------------------------------------------------------------------------------------------------------------------------------------------------------------------------------------------------------------------------------------------------------------------------------------------------------------------------------------------------------------|----------------------------------------------------------------------------------------------------------------------------------------------------------------------------|
| <b>Sociodemographic characteristics<sup>1</sup></b>                                                                                                                                                                                                                                                                                                                                                                                                                                                                       |                                                                                                                                                                            |
| <ul style="list-style-type: none"> <li>Age and cultural background (baseline only); marital status, education, and income, where income was defined as pre-tax annual income from all sources of employment including unreported income and excluding any money received from family, friends or income assistance.</li> </ul>                                                                                                                                                                                            | Low income (living on a less than \$20,000 per year); limited education (having less than high school); single (not married or common-law); dichotomous (yes/no) variable. |
| <b>Unstable housing</b>                                                                                                                                                                                                                                                                                                                                                                                                                                                                                                   |                                                                                                                                                                            |
| <ul style="list-style-type: none"> <li>Having to move 3 or more times or experiencing homelessness (past year).</li> </ul>                                                                                                                                                                                                                                                                                                                                                                                                | Dichotomous (yes/no) variable.                                                                                                                                             |
| <b>Psychological distress<sup>2</sup></b>                                                                                                                                                                                                                                                                                                                                                                                                                                                                                 |                                                                                                                                                                            |
| <ul style="list-style-type: none"> <li>Kessler Psychological Distress Scale; Likert scale with 10 items, e.g., “About how often did you feel hopeless?”</li> </ul>                                                                                                                                                                                                                                                                                                                                                        | Moderate-to-severe anxiety or depression.                                                                                                                                  |
| <b>Maltreatment experiences</b>                                                                                                                                                                                                                                                                                                                                                                                                                                                                                           |                                                                                                                                                                            |
| <ul style="list-style-type: none"> <li>Child maltreatment; Childhood Trauma Questionnaire, Short Form;<sup>3</sup> Likert scale with 28 items, e.g., “When I was growing up, I didn’t have enough to eat.”</li> <li>Intimate partner violence (past year); Composite Abuse Scale;<sup>4</sup> Likert scale with 30 items, e.g., “My partner told me that I wasn’t good enough;” partner was defined as husband/wife, partner, or boy/girlfriend for longer than one month.</li> </ul>                                     | Moderate-to-severe levels of neglect, physical abuse, emotional abuse and/or sexual abuse.<br>Any physical abuse, emotional abuse and harassment.                          |
| <b>Prenatal substance use<sup>5</sup></b>                                                                                                                                                                                                                                                                                                                                                                                                                                                                                 |                                                                                                                                                                            |
| <ul style="list-style-type: none"> <li>Tobacco (number of cigarettes smoked in past 2 days)</li> <li>Alcohol (frequency of drinking in past month)</li> <li>Cannabis (frequency of using all forms of cannabis, marijuana or hashish in past month);</li> <li>Street drugs (frequency of using LSD, magic mushrooms, ecstasy, cocaine, speed, heroin and/or crystal methamphetamines in past month).</li> <li>“Any” substance use was defined as any-or-all of tobacco, alcohol, cannabis and/or street drugs.</li> </ul> | Count.<br>Frequency; dichotomous (yes/no) variables.                                                                                                                       |

1. Statistics Canada. 2006 Census of Population. 2010. <https://www12.statcan.gc.ca/census-recensement/2006/index-eng.cfm> (accessed June 8, 2019).

2. Kessler RC, Andrews G, Colpe LJ, et al. Short screening scales to monitor population prevalences and trends in non-specific psychological distress. *Psycholo Med* 2002;32:959–976.

3. Bernstein DP, Stein JA, Newcomb MD, et al. Development and validation of a brief screening version of the Childhood Trauma Questionnaire. *Child Abuse Negl* 2003;27:169–190.

4. Hegarty K, Bush R, Sheehan M. The Composite Abuse Scale: Further development and assessment of reliability and validity of a multidimensional partner abuse measure in clinical settings. *Violence Vict* 2005;20:529–547.

5. Statistics Canada. National Longitudinal Survey of Children and Youth (Cycle 8).

2009. [http://www23.statcan.gc.ca/imdb-bmdi/document/4450\\_D2\\_T9\\_V4-eng.pdf](http://www23.statcan.gc.ca/imdb-bmdi/document/4450_D2_T9_V4-eng.pdf) (accessed February 5, 2019).

### **Ethics approval**

The trial received research ethics approvals from: Simon Fraser University; University of BC; University of Victoria; McMaster University; Public Health Agency of Canada; and Fraser, Interior, Island and Vancouver Coastal Health Authorities. An independent Data and Safety Monitoring Committee has also tracked participant safety and protocol compliance.

### **Outcome indicators**

The pre-specified main trial outcome indicators were: prenatal substance use (cigarettes and alcohol); child injuries (primary indicator) and cognitive development and behaviour by age two years; and maternal subsequent pregnancies by 24-months postpartum.<sup>23</sup> The prenatal indicators were defined as changes in cigarette and alcohol use between early and late pregnancy; exploratory data on other prenatal substances used were also collected.

### **Sample size calculation**

The sample size was determined based on detecting clinically meaningful differences in reducing the primary outcome indicator, healthcare encounters for childhood injuries by age two years. We originally estimated that we needed a sample size of 1040 to detect a 30% relative risk reduction where  $\alpha=.05$  and  $\beta=0.20$  and presuming low attrition (<5%) due to accessing provincial administrative health data on child injuries.<sup>23</sup> However, re-estimations based on analysis of 10 years of provincial childhood injury data in a similar population (children born to pregnant girls and young women receiving income assistance and preparing to parent for the first time) indicated a lower expected incidence of childhood injuries, allowing a smaller sample (739) to suffice.

## Statistical analysis

We conducted the intention-to-treat (ITT) analyses of NFP's effects: on pre-specified substance use outcomes, namely cigarette and alcohol use ( $n=739$ ); subgroup analysis examining the number of cigarettes smoked daily for those who reported smoking in either early or late pregnancy or both ( $n=211$  "smokers"); and exploratory ITT analyses on additional (non-pre-specified) substance use outcomes of interest, specifically cannabis and street drugs, that may be influenced by NFP. We analyzed the longitudinal measures of substance use at baseline (less than 28 weeks gestation) and late pregnancy (34–36 weeks gestation) using Generalized Linear Mixed-effect Models (GLMMs). GLMMs incorporated fixed effects for: 1) time period (baseline versus late pregnancy) for time effects; 2) NFP versus comparison at baseline; and 3) time period by NFP interaction for NFP intervention effect by late pregnancy. These models also included random effects for clusters (i.e., participants nested within LHAs within HAs). Model estimates (95% confidence intervals [CI]) and the associated two-side  $p$ -values were determined. We estimated proportions using the fitted models and calculated 95% CIs using 1,000 bootstrap samples. We also estimated GLMMs adjusting additionally for baseline covariates. (See Table 3.) We assessed the sensitivity of the results to missing-at-random assumptions via selection models.<sup>26–29</sup> All analyses were conducted using R 3.5.<sup>30</sup> (See Appendix 1 for details.)

## Results

### Participant recruitment and flow

Recruitment occurred from October 2013 through December 2016. Prenatal follow-up closed in March 2017. NFP delivery concluded in June 2019 when all children reached age two years. Research interviews will conclude in late 2019, while final provincial administrative health data on child injuries will be received in 2020. Overall, 739 participants were randomly allocated to either intervention (NFP plus existing services, n=368) or comparison (existing services, n=371) groups; 667 (90%) completed the follow-up interview in late pregnancy. (See Figure 1.) All 739 participants were included in the ITT analyses. Baseline characteristics were well balanced across the two trial groups (See Table 3.) No protocol deviations or unanticipated problems, including unanticipated serious adverse events, have been identified/reported since the trial commenced in 2013. (See Appendix 2 for definitions.)

[Insert Figure 1 and Table 3; Figure 1 submitted separately]

**Table 3. Participant characteristics at baseline\***

|                                                                 | <b>Comparison</b><br><i>n</i> = 371 | <b>NFP</b><br><i>n</i> = 368 |
|-----------------------------------------------------------------|-------------------------------------|------------------------------|
| <b>Sociodemographic characteristics</b>                         | n/N (%)                             | n/N (%)                      |
| • Age (19 years or younger)                                     | 175/371 (47.2)                      | 186/368 (50.5)               |
| • Single (not married or common-law)                            | 337/369 (91.3)                      | 333/367 (90.7)               |
| • Cultural background*                                          |                                     |                              |
| – White                                                         | 217/371 (58.5)                      | 201/368 (54.6)               |
| – Indigenous including First Nations, Métis and Inuit           | 44/371 (11.9)                       | 35/368 (9.5)                 |
| – Indigenous including First Nations, Métis and Inuit and Other | 56/371 (15.1)                       | 65/368 (17.7)                |
| – Mixed heritage $\geq 2$                                       | 23/371 (6.2)                        | 32/368 (8.7)                 |
| – Asian (Chinese, South Asian or Other)                         | 16/371 (4.3)                        | 16/368 (4.3)                 |
| – Other (including Latin-American, Black)                       | 15/371 (4)                          | 19/368 (5.2)                 |
| • Highest educational qualification                             |                                     |                              |
| – Less than high school                                         | 193/371 (52)                        | 191/367 (52)                 |
| – High school diploma or equivalent                             | 139/371 (37.5)                      | 131/367 (35.7)               |
| – College or other non-university or university degree          | 39/371 (10.5)                       | 45/367 (12.3)                |
| • Income from employment (CAD)                                  |                                     |                              |
| – Less than \$5,000                                             | 146/362 (40.3)                      | 162/364 (44.5)               |
| – \$5,000 – 9,999                                               | 64/362 (17.7)                       | 54/364 (14.8)                |
| – \$10,000 – 19,999                                             | 87/362 (24)                         | 93/364 (25.5)                |
| – \$20,000 – 29,999                                             | 38/362 (10.5)                       | 37/364 (10.2)                |
| – \$30,000 or more                                              | 27/362 (7.5)                        | 18/364 (4.9)                 |
| <b>Unstable housing</b>                                         |                                     |                              |
| • Homeless ever (including currently)                           | 157/356 (44.1)                      | 176/360 (48.9)               |
| • Currently homeless                                            | 11/359 (3.1)                        | 11/362 (3)                   |
| • Moved 3 or more times or homeless (past year)                 | 187/366 (51.1)                      | 198/365 (54.2)               |
| <b>Mental health</b>                                            |                                     |                              |
| • Moderate/severe psychological distress (past month)           | 122/370 (33)                        | 112/364 (30.8)               |
| <b>Maltreatment experiences</b>                                 |                                     |                              |
| • Child maltreatment at age 16 years or younger                 | 206/367 (56.1)                      | 204/361 (56.5)               |
| • Exposure to intimate partner violence (past year)             | 187/369 (50.7)                      | 176/365 (48.2)               |

\* Categories according to Statistics Canada; participants could give more than one answer.

## Outcomes and effect estimation

### *Cigarette smoking*

In early pregnancy, 26.6% of participants reported smoking cigarettes (in the past two days). By late pregnancy, the proportion decreased in both groups (by 5.8% for NFP versus 2.4% for comparison; see Table 4). The estimated differences in the before-after changes of log odds and proportions of cigarette use were: -1.72 ([95% CI=-3.86 to 0.42],  $p=0.116$ ; see Table 5), and -3.2 (95% CI=-7.3 to 0.8) percentage units (see Table 6), respectively.

[Insert Tables 4–6; Table 5 submitted separately]

Confidential

**Table 4. Substance use in early and late pregnancy\***

|                                         | Baseline (<28 Weeks) |                | Weeks 34–36     |                |
|-----------------------------------------|----------------------|----------------|-----------------|----------------|
|                                         | Early Pregnancy      |                | Late Pregnancy  |                |
|                                         | Comparison           | NFP            | Comparison      | NFP            |
| <i>N</i>                                | 371                  | 368            | 371             | 368            |
| Cigarette                               |                      |                |                 |                |
| Cigarette (%)                           | 103/370 (27.8)       | 93/366 (25.4)  | 85/335 (25.4)   | 64/326 (19.6)  |
| Cigarette count, smokers,** mean (SD)/N | 6.83 (6.07)/115      | 8.37(6.81)/96  | 5.86 (5.85)/106 | 6.06 (7.03)/79 |
| Alcohol (%)                             | 19/369 (5.1)         | 23/367 (6.3)   | 11/335 (3.3)    | 12/326 (3.7)   |
| Cannabis (%)                            | 96/371 (25.9)        | 93/367 (25.3)  | 71/335 (21.2)   | 55/326 (16.9)  |
| Street drug (%)                         | 4/369 (1.1)          | 9/366 (2.5)    | 2/335 (0.6)     | 0/326 (0)      |
| Any substance use (%)                   | 158/367 (43.1)       | 159/363 (43.8) | 127/335 (37.9)  | 106/326 (32.5) |

\* Data are n/N (%) or mean (SD)/N.

\*\* “Smokers” defined those using cigarettes in either early or late pregnancy or both.

**Table 6. Estimated difference in before-after change in proportions of substance use**

|                                  | Difference in Before-After Change in Proportions |                            |
|----------------------------------|--------------------------------------------------|----------------------------|
|                                  | Crude                                            | Estimated (95% CI)         |
| Cigarette (%)                    | -3.31                                            | -3.2 (-7.3, 0.8)           |
| Cigarette – All (Count)          | -0.57                                            | -0.36 (-0.82, 0.16)        |
| Cigarette – Smokers only (Count) | <b>-1.74</b>                                     | <b>-1.78 (-3.0, -0.32)</b> |
| Alcohol (%)                      | -0.72                                            | -0.5 (-4.2, 3.2)           |
| Cannabis (%)                     | <b>-3.79</b>                                     | <b>-5.4 (-10.9, -1.2)</b>  |
| Street drugs (%)                 | -1.97                                            | -2.0 (-4.3, 0.2)           |
| Any substance use (%)            | -6.14                                            | -6.4 (-14.5, 1.8)          |

Note: 95% confidence intervals (CI) were estimated using 1,000 bootstrap sampling; bolding indicates statistical significance.

Confidential



### ***Subgroup analysis – smokers***

We explored cigarette use in participants who reported smoking in either early or late pregnancy or both (n=211; 28.9%). By late pregnancy, the average number of cigarettes smoked decreased in both groups — by 1.2 per day in the NFP group versus 0.5 per day in the comparison group. (See Table 4.) The estimated differences in the before-after changes of log rate and mean number of cigarette counts were: -0.2 ([95% CI=-0.36 to -0.05],  $p=0.011$ ; see Table 5), and -1.78 (95% CI=-3.0 to -0.32) counts (see Table 6), respectively.

### ***Alcohol use***

In early pregnancy, 5.7% of participants reported consuming alcohol (in the past month). By late pregnancy, the proportion decreased in both groups — by 2.6% in the NFP group versus 1.8% in the comparison group. (See Table 4.) The estimated difference in the before-after changes of percentage of alcohol use was -0.5 ([95% CI=-4.2 to 3.2],  $p=0.791$ ) percentage units (see Table 4).

### **Exploratory analyses**

#### ***Cannabis use***

In early pregnancy, 25.6% of participants reported using cannabis (in the past month). By late pregnancy, the proportion decreased in both groups — by 8.4% in the NFP group versus 4.7% in the comparison group (see Table 4). The estimated differences in before-after changes of log odds and percentage of cannabis use were: -3.39 ([95% CI=-5.35 to -1.42],  $p<0.001$ ; see Table 5), and -5.4 (95% CI=-10.9 to -1.2) percentage units (see Table 6), respectively.

### ***Street drug use***

In early pregnancy, 1.8% of participants reported using street drugs (in the past month). By late pregnancy, the proportion decreased in both groups — by 2.5% in the NFP group versus 0.5% in the comparison group (see Table 4). The estimated difference in the before-after changes of percentages of street drug use was -2.0 ([95% CI=-4.3 to 0.2],  $p=0.074$ ) percentage units (see Table 6).

### ***Any substance use***

In early pregnancy, 43.4% of participants reported using any substance (cigarettes, alcohol, cannabis and/or street drugs). By late pregnancy, the proportion decreased in both groups — by 11.3% in the NFP group versus 5.2% in the comparison group (see Table 4). The estimated differences in before-after change of log odds and percentages of any substance use were: -0.61 ([95% CI=-1.31 to 0.09],  $p=0.085$ ; Table 5), and -6.4 (95% CI=-14.5 to 1.8) percentage units (see Table 6), respectively.

### **Sensitivity analysis**

We found negligible impacts of non-random missingness on the ITT estimates (see Table 7; Appendix).<sup>31</sup> GLMM analyses including additional baseline covariates showed that the intervention effect estimates remained similar (see Table 5; last two columns).

### **Interpretation**

All 739 participants were included in the ITT analyses. By late pregnancy, we observed decreased rates of prenatal cigarette and alcohol use for NFP participants but decreases were not significant. In smokers, however, we found a significant reduction in daily cigarette smoking ( $p=0.01$ ). NFP also significantly reduced prenatal rates of cannabis use ( $p<0.001$ ), but not rates of “any” substance use or street drug use.

1  
2  
3 For cigarette use, we found high smoking rates (26.6%) in early pregnancy but no  
4 evidence of benefit from NFP by late pregnancy. However, among smokers, daily cigarette  
5 counts were significantly reduced in the NFP group (by 1.2 for NFP versus 0.5 for controls;  
6  $p=.01$ ). Similarly, previous NFP trials in the US<sup>20</sup> and the Netherlands<sup>21</sup> have shown small but  
7 significant prenatal smoking reductions, although a trial in England did not.<sup>22</sup> Between-study  
8 differences may be attributable to divergences in populations, NFP implementation and baseline  
9 health and social services. Yet while the prenatal smoking decreases among smokers in our study  
10 were modest, even minimal reductions are associated with benefits for the developing fetus.<sup>5</sup>  
11 NFP therefore shows promise for populations like our cohort, particularly given the high  
12 smoking rates we found —building on other harm reduction efforts.<sup>32–34</sup>

13  
14  
15 For prenatal alcohol use, we found relatively low alcohol use rates (5.7%) in early  
16 pregnancy but no evidence of benefit from NFP by late pregnancy. Similarly, previous US NFP  
17 trials have not shown significant reductions in prenatal alcohol use.<sup>20</sup> As there is no safe level of  
18 prenatal alcohol consumption, ongoing harm reduction efforts remain crucial.<sup>6,35</sup> Even so, our  
19 findings suggest that prenatal alcohol use — despite its clinical and public health importance —  
20 may be too infrequent to be a useful focus for an intervention such as NFP in a cohort like ours.

21  
22 While prenatal cannabis was not a pre-specified outcome indicator, we identified high  
23 rates of use (25.6%) — and found that NFP significantly reduced these rates by late pregnancy  
24 ( $p<0.001$ ). Prenatal cannabis use is rising in Canada, particularly in young, at-risk populations.<sup>16</sup>  
25 Possible explanations include greater access to cannabis compared with alcohol for these  
26 populations.<sup>36</sup> Yet the rates are concerning given adverse consequences for the developing  
27 fetus,<sup>1,2,7</sup> increasing potency of cannabis,<sup>37</sup> and public perceptions of cannabis as relatively  
28 harmless or even beneficial in pregnancy.<sup>38</sup> Prenatal cannabis harm reduction efforts should

1  
2  
3 therefore be intensified. Based on our findings, NFP shows considerable promise as part of these  
4 efforts, particularly for disadvantaged populations.  
5  
6

7  
8 At the same time, we found no evidence of benefit from NFP regarding “any” substance  
9 use or street drug use, two other exploratory outcomes of interest. Similarly for street drugs,  
10 previous NFP trials in the US, the Netherlands and England have not shown significant  
11 reductions in prenatal use.<sup>20–22</sup> The lack of effect in our case may also be due to the low rate of  
12 baseline use (1.8%).  
13  
14  
15  
16  
17  
18

19 Our study also has limitations. We relied on maternal self-report data on prenatal  
20 substance use. For cigarettes in particular, self-reports may underestimate smoking by up to 25%  
21 compared to serum cotinine.<sup>39</sup> Yet previous US trials have shown that NFP participants who  
22 were smokers, compared to control-group counterparts, became more accurate reporters by the  
23 end of pregnancy.<sup>40</sup> This suggests that our findings for smokers may indeed reflect program  
24 effects. We also collected only limited/preliminary data on prenatal e-cigarette use. The use of  
25 this mode of nicotine delivery has increased considerably since we commenced the trial,  
26 particularly with youth.<sup>41</sup> Future trials should examine prenatal e-cigarette use. Similarly, we did  
27 not collect specific data on opioid use, although opioids were included with general questions on  
28 street drugs. Opioids have become of high clinical and public health salience since we  
29 commenced the trial.<sup>42</sup> Future trials of a similar nature should therefore examine opioid use.  
30  
31 Finally, our findings are specific to a high-risk Canadian cohort of pregnant girls and young  
32 women who were preparing to parent for the first time and so, may not be generalizable to other  
33 populations.  
34  
35  
36  
37  
38  
39  
40  
41  
42  
43  
44  
45  
46  
47  
48  
49  
50

51 In conclusion, we found no evidence that NFP was effective in reducing rates of prenatal  
52 cigarette and alcohol use in a young Canadian cohort experiencing socioeconomic disadvantage.  
53  
54  
55  
56  
57  
58  
59  
60

1  
2  
3 However, for prenatal smokers, the program was effective in reducing the daily number of  
4  
5 cigarettes consumed. As well, NFP reduced prenatal cannabis use — a growing public health  
6  
7 problem in Canada.  
8  
9  
10  
11  
12  
13  
14  
15  
16  
17  
18  
19  
20  
21  
22  
23  
24  
25  
26  
27  
28  
29  
30  
31  
32  
33  
34  
35  
36  
37  
38  
39  
40  
41  
42  
43  
44  
45  
46  
47  
48  
49  
50  
51  
52  
53  
54  
55  
56  
57  
58  
59  
60

Confidential

1  
2  
3  
4 **Contributions:** NC, MB, YF, LM[1], HX, RL, DS, AG[1], SJ, AG[2], LT, LM[2], CV, AC,  
5  
6 KH, CR, RB, HM and CW made substantial contributions to the study design. Funding was  
7  
8 acquired by CW, HM and NC with contributions from MB, DS, AG[1], AG [2], SJ, LT, LM[2]  
9  
10 and CV. NC and CW provided project administration and management. NC supervised data  
11  
12 acquisition and preparation. AC, KH, CR, NR and AS made substantial contributions to  
13  
14 methods, data acquisition and preparation. MB, YZ, LM[1], HX and NC conducted the formal  
15  
16 data analyses and all authors interpreted the data. NC and CW drafted the manuscript. All  
17  
18 authors then critically revised the manuscript for important intellectual content, approved the  
19  
20 final version, and agreed to be accountable for all aspects of the work. We believe that all  
21  
22 authors meet your requirements for authorship.  
23  
24  
25  
26  
27

28 **Data sharing:** Following completion of this trial and following publication of all major findings  
29  
30 papers, anonymized participant data and associated documents including the study protocol and  
31  
32 statistical analysis plan may be shared. Protocols for accessing study data and information will  
33  
34 be governed by a data-sharing agreement. For more information, please contact the  
35  
36 corresponding author.  
37  
38  
39  
40

41 **Acknowledgements:** We thank the families who participated in the study. This work is  
42  
43 dedicated to them. We acknowledge the public health nurses and supervisors who delivered the  
44  
45 intervention, and the study team members who have implemented the trial. We are also grateful  
46  
47 to our policy and practice collaborators, as well as to David Olds and Harry Shannon for  
48  
49 consulting. During this study, Michael Boyle and Charlotte Waddell were supported by Canada  
50  
51 Research Chairs; Harriet MacMillan was supported by the Chedoke Health Chair in Child  
52  
53 Psychiatry; and Andrea Gonzalez was supported by a Canadian Institutes of Health Research  
54  
55  
56  
57  
58  
59  
60

1  
2  
3 New Investigator Award and by an Ontario Ministry of Research, Innovation and Science Early  
4  
5 Researcher Award.  
6  
7  
8  
9  
10  
11  
12  
13  
14  
15  
16  
17  
18  
19  
20  
21  
22  
23  
24  
25  
26  
27  
28  
29  
30  
31  
32  
33  
34  
35  
36  
37  
38  
39  
40  
41  
42  
43  
44  
45  
46  
47  
48  
49  
50  
51  
52  
53  
54  
55  
56  
57  
58  
59  
60

Confidential

## References

1. Irner TB. Substance exposure in utero and developmental consequences in adolescence: A systematic review. *Child Neuropsychology* 2012;18:521–549.
2. Behnke M, Smith VC, Committee on Substance Abuse et al. Prenatal substance abuse: Short- and long-term effects on the exposed fetus. *Pediatrics* 2013;131:e1009–1024.
3. Viteri OA, Soto EE, Bahado-Singh RO, et al. Fetal anomalies and long-term effects associated with substance abuse in pregnancy: A literature review. *Am J Perinatol* 2015;32:405–416.
4. Banderali G, Martelli A, Landi M, et al. Short and long term health effects of parental tobacco smoking during pregnancy and lactation: A descriptive review. *J Transl Med* 2015;13:327,e1–7.
5. Berlin I, Golmard JL, Jacob N, et al. Cigarette smoking during pregnancy: Do complete abstinence and low level cigarette smoking have similar impact on birth weight? *Nicotine Tob Res* 2017;19:518–524.
6. Mamluk L, Edwards HB, Savović J, et al. Low alcohol consumption and pregnancy and childhood outcomes: Time to change guidelines indicating apparently ‘safe’ levels of alcohol during pregnancy? A systematic review and meta-analyses. *BMJ Open* 2017;7:e015410.
7. Luke S, Hutcheon J, Kendall T. Cannabis use in pregnancy in British Columbia and selected birth outcomes. *J Obstet Gynaecol Can* 2019;41:1311–1317.
8. Corsi DJ, Walsh L, Weiss D, et al. Association between self-reported prenatal cannabis use and maternal, perinatal, and neonatal outcomes. *JAMA* 2019;322:145–152.
9. Gouin K, Murphy K, Shah PS. Effects of cocaine use during pregnancy on low birthweight and preterm birth: Systematic review and meta-analyses. *Am J Obstet Gynecol* 2011;204:340,e1–12.
10. Beckwith AM, Burke SA. Identification of early developmental deficits in infants with prenatal heroin, methadone, and other opioid exposure. *Clin Pediatr* 2015;54:328–335.
11. Al-Sahab B, Saqib M, Hauser G, et al. Prevalence of smoking during pregnancy and associated risk factors among Canadian women: A national survey. *BMC Pregnancy Childbirth* 2010;10:24,e1–9.
12. Cui Y, Shoostari S, Forget EL, et al. Smoking during pregnancy: Findings from the 2009–2010 Canadian Community Health Survey. *PLoS One* 2014;9:84640,e1–5.



13. Lange S, Quere M, Shield K, et al. Alcohol use and self-perceived mental health status among pregnant and breastfeeding women in Canada: A secondary data analysis. *BJOG* 2016;123:900–909.
14. Popova S, Lange S, Probst C, et al. Prevalence of alcohol consumption during pregnancy and Fetal Alcohol Spectrum Disorders among the general and Aboriginal populations in Canada and the United States. *Eur J Med Genet* 2017;60:32–48.
15. Corsi DJ, Hsu H, Weiss D, et al. Trends and correlates of cannabis use in pregnancy: A population-based study in Ontario, Canada from 2012 to 2017. *Can J Public Health* 2019;110:76–84.
16. Porath AJ, Kent P, Konefal S. *Clearing the smoke on cannabis: Maternal cannabis use during pregnancy – An update*. Ottawa, ON: Canadian Centre on Substance Use and Addiction; 2018.
17. World Health Organization. *Guidelines for the identification and management of substance use and substance use disorders in pregnancy*. Geneva, Switzerland: World Health Organization; 2014.
18. Hutson J. A prenatal perspective on the cost of substance abuse in Canada. *JFAS Int* 2006;4:e9–13.
19. Brown RA, Dakkak H, Gilliland J, et al. Predictors of drug use during pregnancy: The relative effects of socioeconomic, demographic, and mental health risk factors. *J Neonatal Perinatal Med* 2019;12:179–187.
20. Olds DL. Preventing child maltreatment and crime with prenatal and infancy support of parents: The Nurse-Family Partnership. *J Scand Stud Criminol Crime Prev* 2008;9:2–24.
21. Mejdoubi J, van den Heijkant SCCM, van Leerdam FJM, et al. Effects of nurse home visitation on cigarette smoking, pregnancy outcomes and breastfeeding: A randomized controlled trial. *Midwifery* 2014;30:688–695.
22. Robling M, Bekkers MJ, Bell K, et al. Effectiveness of a nurse-led intensive home-visit programme for first-time teenage mothers (Building Blocks): A pragmatic randomised controlled trial. *The Lancet* 2016;387:146–155.
23. Catherine NLA, Gonzalez A, Boyle M, et al. Improving children’s health and development in British Columbia through nurse home visiting: A randomized controlled trial protocol. *BMC Health Serv Res* 2016;16:349,e1–13.
24. Catherine NLA, Lever R, Sheehan D, et al. The British Columbia Healthy Connections Project: Findings on socioeconomic disadvantage in early pregnancy. *BMC Public Health* 2019;19:1161,e1–11.

25. Jack SM, Catherine N, Gonzalez A, et al. Adapting, piloting and evaluating complex public health interventions: Lessons learned from the Nurse-Family Partnership in Canadian public health settings. *Health Promot Chronic Dis Prev Can* 2015;35:151–159.
26. Ma G, Troxel AB, Heitjan DF. An index of local sensitivity to nonignorable drop-out in longitudinal modelling. *Stat Med* 2005;24:2129–2150.
27. Xie H. A local sensitivity analysis approach to longitudinal non-Gaussian data with non-ignorable dropout. *Stat Med* 2008;27: 3155–3177.
28. Xie H, Qian Y. Measuring the impact of nonignorability in panel data with non-monotone nonresponse. *J App Econom* 2012;27:129–159.
29. Xie H, Gao W, Xing B, et al. Measuring the impact of nonignorable missingness using the R package isni. *Comput Methods Programs Biomed* 2018;164:207–120.
30. R Core Team. *R: A language and environment for statistical computing*. Vienna, Austria: R Foundation for Statistical Computing; 2018.
31. Xie H, Heitjan DF. Sensitivity analysis of causal inference in a clinical trial subject to crossover. *Clin Trials* 2004;1:21–30.
32. Greaves L, Poole N, Hemsing N. Tailored intervention for smoking reduction and cessation for young and socially disadvantaged women during pregnancy. *J Obstet Gynecol Neonatal Nurs* 2019;48:90–98.
33. Twyman L, Bonevski B, Paul C, et al. Perceived barriers to smoking cessation in selected vulnerable groups: A systematic review of the qualitative and quantitative literature. *BMJ Open* 2014;4:006414,e1–15.
34. Marcellus L, Poole N, Hemsing N. Beyond abstinence: Harm reduction during pregnancy and early parenting. In Peterson W, Armstrong LL, Foulkes M, Editors. *Mothers, addiction and recovery: Finding meaning through the journey*. Bradford, ON: Demeter Press; 2018.
35. Nathoo T, Poole N, Bryans M, et al. Voices from the community: Developing effective community programs to support pregnant and early parenting women who use alcohol and other substances. *First Peoples Child & Family Review* 2013;8:93–106.
36. Singh VAS, Thornton T, Tonmyr L. Determinants of substance abuse in a population of children and adolescents involved with the child welfare system. *Int J Men Health Addiction* 2011;9:382–397.
37. Stickrath E. Marijuana use in pregnancy: An updated look at marijuana use and its impact on pregnancy. *Clin Obstet Gynecol* 2019;62:185–190.

- 1
- 2
- 3
- 4 38. Bayrampour H, Zahradnik M, Lisonkova S, et al. Women's perspectives about cannabis
- 5 use during pregnancy and the postpartum period: An integrative review. *Prev Med*
- 6 2019;119:17–23.
- 7
- 8 39. Shipton D, Tappin DM, Vadiveloo T, et al. Reliability of self reported smoking status by
- 9 pregnant women for estimating smoking prevalence: A retrospective, cross sectional study.
- 10 *BMJ* 2009;339:b4347,e1–8.
- 11
- 12 40. Olds DL, Henderson CR, Tatelbaum R, et al. Improving the delivery of prenatal care and
- 13 outcomes of pregnancy: A randomized trial of nurse home visitation. *Pediatrics*
- 14 1986;77:16–28.
- 15
- 16
- 17 41. Hammond D, Reid JL, Rynard VL, et al. Prevalence of vaping and smoking among
- 18 adolescents in Canada, England, and the United states: Repeat national cross sectional
- 19 surveys. *BMJ* 2019;365:I2219,e1–9.
- 20
- 21
- 22 42. Falk J, Dahl M, Raymond CB, et al. Opioid use during pregnancy: A population-based
- 23 cohort study. *CMAJ Open* 2017;5:e517–523.
- 24
- 25
- 26
- 27
- 28
- 29
- 30
- 31
- 32
- 33
- 34
- 35
- 36
- 37
- 38
- 39
- 40
- 41
- 42
- 43
- 44
- 45
- 46
- 47
- 48
- 49
- 50
- 51
- 52
- 53
- 54
- 55
- 56
- 57
- 58
- 59
- 60

**Figure 1: Participant Flow Diagram**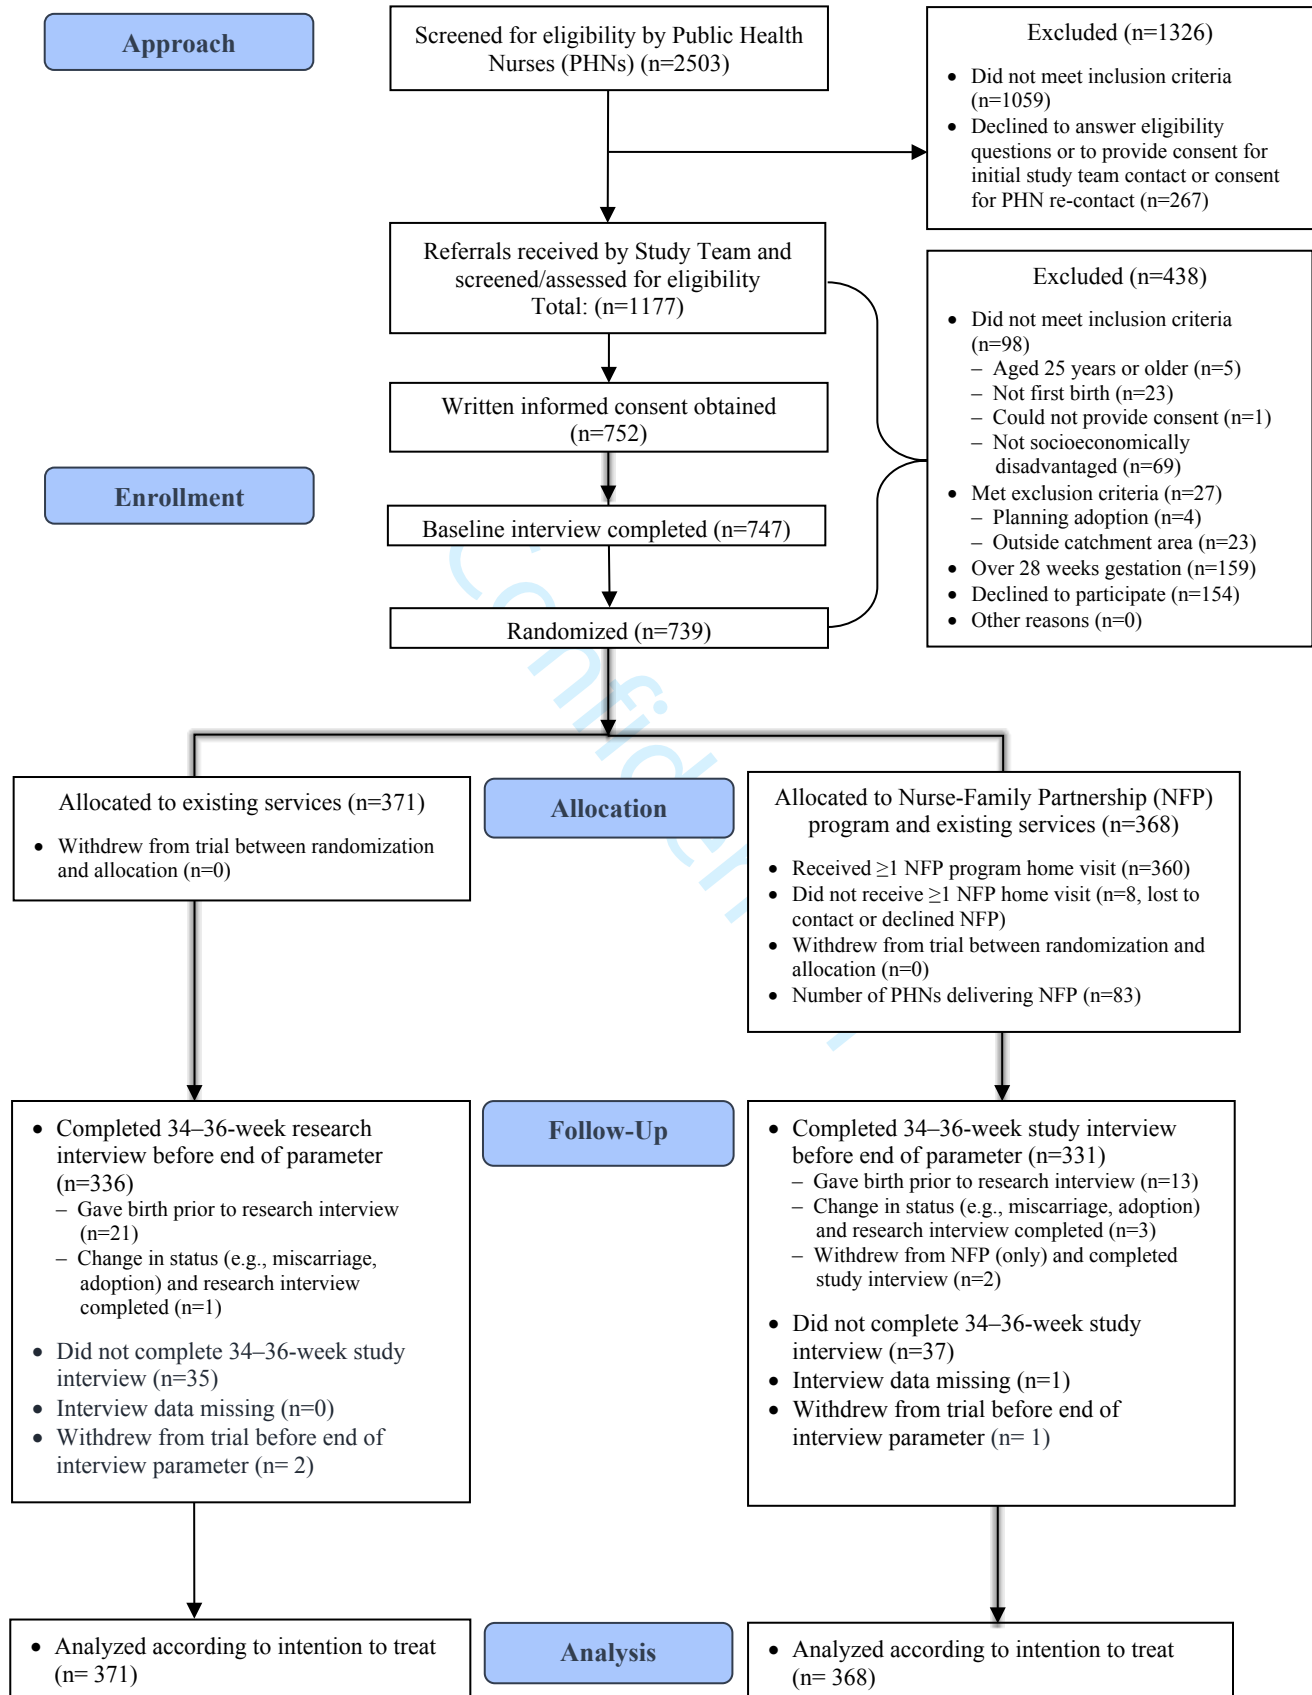

Figure 1: Participant Flow Diagram

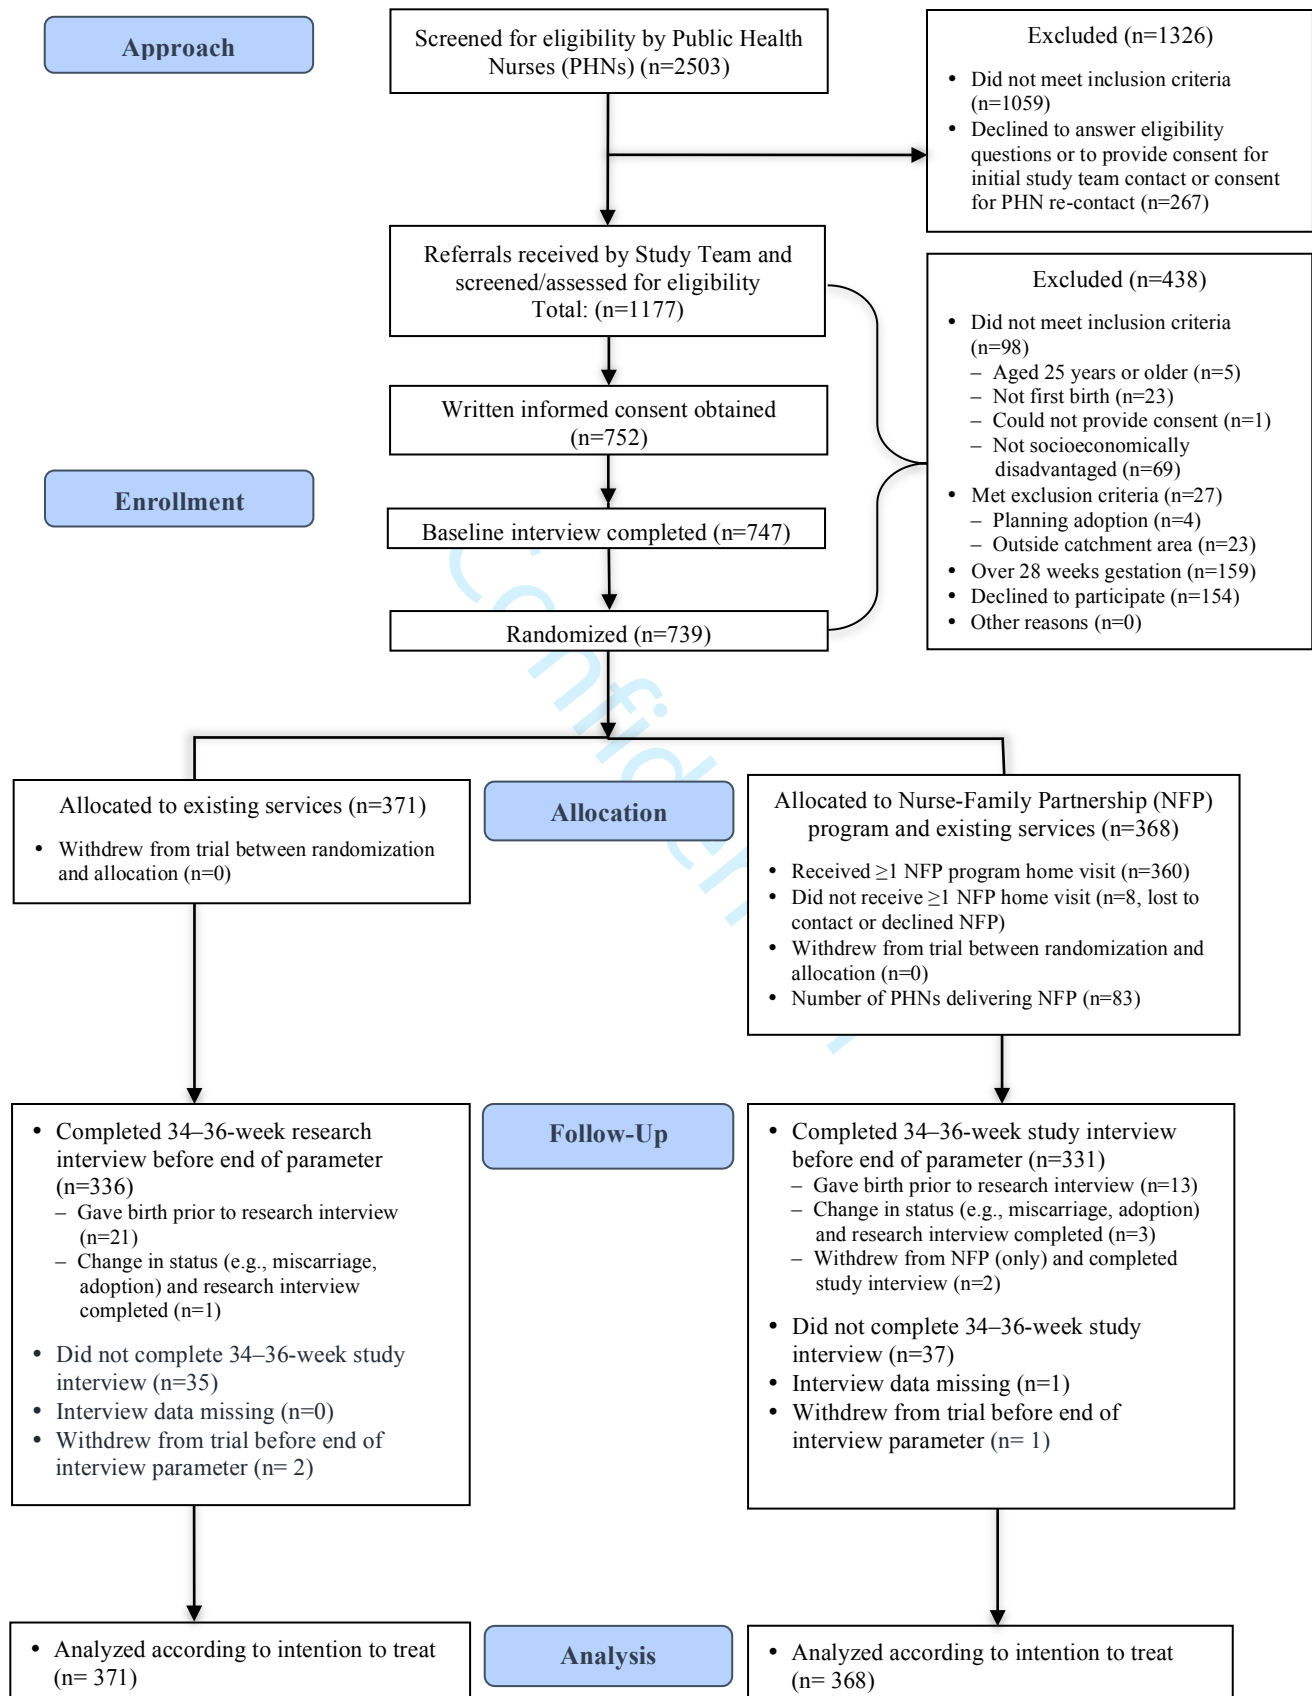

1  
2  
3  
4  
5  
6  
7  
8  
9  
10  
11  
12  
13  
14  
15  
16  
17  
18  
19  
20  
21  
22  
23  
24  
25  
26  
27  
28  
29  
30  
31  
32  
33  
34  
35  
36  
37  
38  
39  
40  
41  
42  
43  
44  
45  
46  
47

**Table 5. Coefficients from two-level mixed effect models:  
Primary and robustness analysis\***

|                                          | Primary Analysis         |                 |                          |                 | Robustness Analysis                   |                  |                           |                 |
|------------------------------------------|--------------------------|-----------------|--------------------------|-----------------|---------------------------------------|------------------|---------------------------|-----------------|
|                                          | Week 34–36               |                 | NFP                      |                 | Treatment Effect                      |                  | Treatment Effect          |                 |
|                                          | Estimate                 | <i>p</i> -value | Estimate                 | <i>p</i> -value | Estimate                              | <i>p</i> -value  | Estimate                  | <i>p</i> -value |
| Cigarette (Yes/No) <sup>†</sup>          | -1.28<br>(-2.35, -0.21)  | 0.019           | -0.01<br>(-1.29, 1.28)   | 0.99            | -1.72<br>(-3.86, 0.42)                | 0.116            | -1.91<br>(-4.08, 0.26)    | 0.085           |
| Cigarette – Smokers (Count) <sup>‡</sup> | -0.12<br>(-0.23, -0.02)  | 0.02            | 0.23<br>(-0.03, 0.48)    | 0.082           | <b>-0.2</b><br><b>(-0.36, -0.05)</b>  | <b>0.011</b>     | -0.2<br>(-0.36, -0.04)    | 0.012           |
| Alcohol (Yes/No) <sup>§</sup>            | -0.02<br>(-0.046, 0.005) | 0.122           | 0.011<br>(-0.019, 0.042) | 0.47            | -0.005<br>(-0.04, 0.032)              | 0.787            | -0.005<br>(-0.042, 0.032) | 0.791           |
| Cannabis (Yes/No) <sup>†</sup>           | -1.8<br>(-2.8, -0.8)     | <0.001          | 0.07<br>(-1.07, 1.21)    | 0.906           | <b>-3.39</b><br><b>(-5.35, -1.42)</b> | <b>&lt;0.001</b> | -3.82<br>(-5.86, -1.79)   | <0.001          |
| Street drugs (Yes/No) <sup>§</sup>       | -0.005<br>(-0.02, 0.01)  | 0.53            | 0.014<br>(-0.001, 0.029) | 0.07            | -0.02<br>(-0.04, 0.002)               | 0.074            | -0.021<br>(-0.043, 0.002) | 0.074           |
| Any substance (Yes/No) <sup>†</sup>      | -0.53<br>(-1.02, -0.05)  | 0.031           | 0.03<br>(-0.73, 0.8)     | 0.934           | -0.61<br>(-1.31, 0.09)                | 0.085            | -1.06<br>(-1.94, -0.19)   | 0.017           |

<sup>†</sup>: Binary outcomes, logistic mixed effect model. The coefficient for treatment effect represents the estimated group difference in before-after change of log odds of substance use.

<sup>‡</sup>: Count outcomes, Poisson mixed effect model. The coefficient for treatment effect represents the estimated group difference in before-after change of log rate of substance use.

<sup>§</sup>: Binary outcomes, linear mixed effect model. The coefficient for treatment effect represents the estimated group difference in before-after change of proportion of substance use.

\* Bolding indicates statistical significance.

**Table 5. Coefficients from two-level mixed effect models:  
Primary and robustness analysis\***

|                                                | Primary Analysis         |                 |                          |                 | Robustness Analysis                   |                  |                           |                 |
|------------------------------------------------|--------------------------|-----------------|--------------------------|-----------------|---------------------------------------|------------------|---------------------------|-----------------|
|                                                | Week 34–36               |                 | NFP                      |                 | Treatment Effect                      |                  | Treatment Effect          |                 |
|                                                | Estimate                 | <i>p</i> -value | Estimate                 | <i>p</i> -value | Estimate                              | <i>p</i> -value  | Estimate                  | <i>p</i> -value |
| Cigarette<br>(Yes/No) <sup>†</sup>             | -1.28<br>(-2.35, -0.21)  | 0.019           | -0.01<br>(-1.29, 1.28)   | 0.99            | -1.72<br>(-3.86, 0.42)                | 0.116            | -1.91<br>(-4.08, 0.26)    | 0.085           |
| Cigarette –<br>Smokers<br>(Count) <sup>‡</sup> | -0.12<br>(-0.23, -0.02)  | 0.02            | 0.23<br>(-0.03, 0.48)    | 0.082           | <b>-0.2</b><br><b>(-0.36, -0.05)</b>  | <b>0.011</b>     | -0.2<br>(-0.36, -0.04)    | 0.012           |
| Alcohol<br>(Yes/No) <sup>§</sup>               | -0.02<br>(-0.046, 0.005) | 0.122           | 0.011<br>(-0.019, 0.042) | 0.47            | -0.005<br>(-0.04, 0.032)              | 0.787            | -0.005<br>(-0.042, 0.032) | 0.791           |
| Cannabis<br>(Yes/No) <sup>†</sup>              | -1.8<br>(-2.8, -0.8)     | <0.001          | 0.07<br>(-1.07, 1.21)    | 0.906           | <b>-3.39</b><br><b>(-5.35, -1.42)</b> | <b>&lt;0.001</b> | -3.82<br>(-5.86, -1.79)   | <0.001          |
| Street drugs<br>(Yes/No) <sup>§</sup>          | -0.005<br>(-0.02, 0.01)  | 0.53            | 0.014<br>(-0.001, 0.029) | 0.07            | -0.02<br>(-0.04, 0.002)               | 0.074            | -0.021<br>(-0.043, 0.002) | 0.074           |
| Any<br>substance<br>(Yes/No) <sup>†</sup>      | -0.53<br>(-1.02, -0.05)  | 0.031           | 0.03<br>(-0.73, 0.8)     | 0.934           | -0.61<br>(-1.31, 0.09)                | 0.085            | -1.06<br>(-1.94, -0.19)   | 0.017           |

<sup>†</sup>: Binary outcomes, logistic mixed effect model. The coefficient for treatment effect represents the estimated group difference in before-after change of log odds of substance use.

<sup>‡</sup>: Count outcomes, Poisson mixed effect model. The coefficient for treatment effect represents the estimated group difference in before-after change of log rate of substance use.

<sup>§</sup>: Binary outcomes, linear mixed effect model. The coefficient for treatment effect represents the estimated group difference in before-after change of proportion of substance use.

\* Bolding indicates statistical significance.

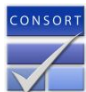

## CONSORT 2010 checklist of information to include when reporting a randomised trial\*

| Section/Topic                    | Item No | Checklist item                                                                                                                                                                              | Reported on page No |
|----------------------------------|---------|---------------------------------------------------------------------------------------------------------------------------------------------------------------------------------------------|---------------------|
| <b>Title and abstract</b>        |         |                                                                                                                                                                                             |                     |
|                                  | 1a      | Identification as a randomised trial in the title                                                                                                                                           | 1                   |
|                                  | 1b      | Structured summary of trial design, methods, results, and conclusions (for specific guidance see CONSORT for abstracts)                                                                     | 3                   |
| <b>Introduction</b>              |         |                                                                                                                                                                                             |                     |
| Background and objectives        | 2a      | Scientific background and explanation of rationale                                                                                                                                          | 4                   |
|                                  | 2b      | Specific objectives or hypotheses                                                                                                                                                           | 4                   |
| <b>Methods</b>                   |         |                                                                                                                                                                                             |                     |
| Trial design                     | 3a      | Description of trial design (such as parallel, factorial) including allocation ratio                                                                                                        | 5                   |
|                                  | 3b      | Important changes to methods after trial commencement (such as eligibility criteria), with reasons                                                                                          | NA                  |
| Participants                     | 4a      | Eligibility criteria for participants                                                                                                                                                       | 6                   |
|                                  | 4b      | Settings and locations where the data were collected                                                                                                                                        | 8                   |
| Interventions                    | 5       | The interventions for each group with sufficient details to allow replication, including how and when they were actually administered                                                       | 7                   |
| Outcomes                         | 6a      | Completely defined pre-specified primary and secondary outcome measures, including how and when they were assessed                                                                          | 10                  |
|                                  | 6b      | Any changes to trial outcomes after the trial commenced, with reasons                                                                                                                       | NA                  |
| Sample size                      | 7a      | How sample size was determined                                                                                                                                                              | 10                  |
|                                  | 7b      | When applicable, explanation of any interim analyses and stopping guidelines                                                                                                                | NA                  |
| <b>Randomisation:</b>            |         |                                                                                                                                                                                             |                     |
| Sequence generation              | 8a      | Method used to generate the random allocation sequence                                                                                                                                      | 7                   |
|                                  | 8b      | Type of randomisation; details of any restriction (such as blocking and block size)                                                                                                         | 7                   |
| Allocation concealment mechanism | 9       | Mechanism used to implement the random allocation sequence (such as sequentially numbered containers), describing any steps taken to conceal the sequence until interventions were assigned | 7                   |
| Implementation                   | 10      | Who generated the random allocation sequence, who enrolled participants, and who assigned participants to interventions                                                                     | 7                   |
| Blinding                         | 11a     | If done, who was blinded after assignment to interventions (for example, participants, care providers, those                                                                                | 7                   |



|                                                      |     |                                                                                                                                                   |            |
|------------------------------------------------------|-----|---------------------------------------------------------------------------------------------------------------------------------------------------|------------|
|                                                      |     | assessing outcomes) and how                                                                                                                       |            |
|                                                      | 11b | If relevant, description of the similarity of interventions                                                                                       | NA         |
| Statistical methods                                  | 12a | Statistical methods used to compare groups for primary and secondary outcomes                                                                     | 11         |
|                                                      | 12b | Methods for additional analyses, such as subgroup analyses and adjusted analyses                                                                  | 17         |
| <b>Results</b>                                       |     |                                                                                                                                                   |            |
| Participant flow (a diagram is strongly recommended) | 13a | For each group, the numbers of participants who were randomly assigned, received intended treatment, and were analysed for the primary outcome    | Figure 1   |
|                                                      | 13b | For each group, losses and exclusions after randomisation, together with reasons                                                                  | Figure 1   |
| Recruitment                                          | 14a | Dates defining the periods of recruitment and follow-up                                                                                           | 12         |
|                                                      | 14b | Why the trial ended or was stopped                                                                                                                | NA         |
| Baseline data                                        | 15  | A table showing baseline demographic and clinical characteristics for each group                                                                  | 13         |
| Numbers analysed                                     | 16  | For each group, number of participants (denominator) included in each analysis and whether the analysis was by original assigned groups           | Tables 4-6 |
| Outcomes and estimation                              | 17a | For each primary and secondary outcome, results for each group, and the estimated effect size and its precision (such as 95% confidence interval) | Tables 4-6 |
|                                                      | 17b | For binary outcomes, presentation of both absolute and relative effect sizes is recommended                                                       | Tables 4-6 |
| Ancillary analyses                                   | 18  | Results of any other analyses performed, including subgroup analyses and adjusted analyses, distinguishing pre-specified from exploratory         | 17         |
| Harms                                                | 19  | All important harms or unintended effects in each group (for specific guidance see CONSORT for harms)                                             | 12         |
| <b>Discussion</b>                                    |     |                                                                                                                                                   |            |
| Limitations                                          | 20  | Trial limitations, addressing sources of potential bias, imprecision, and, if relevant, multiplicity of analyses                                  | 20         |
| Generalisability                                     | 21  | Generalisability (external validity, applicability) of the trial findings                                                                         | 20         |
| Interpretation                                       | 22  | Interpretation consistent with results, balancing benefits and harms, and considering other relevant evidence                                     | 18         |
| <b>Other information</b>                             |     |                                                                                                                                                   |            |
| Registration                                         | 23  | Registration number and name of trial registry                                                                                                    | 5          |
| Protocol                                             | 24  | Where the full trial protocol can be accessed, if available                                                                                       | 22         |
| Funding                                              | 25  | Sources of funding and other support (such as supply of drugs), role of funders                                                                   | 2          |

\*We strongly recommend reading this statement in conjunction with the CONSORT 2010 Explanation and Elaboration for important clarifications on all the items. If relevant, we also recommend reading CONSORT extensions for cluster randomised trials, non-inferiority and equivalence trials, non-pharmacological treatments, herbal interventions, and pragmatic trials. Additional extensions are forthcoming: for those and for up to date references relevant to this checklist, see [www.consort-statement.org](http://www.consort-statement.org).

## Appendices

### 1. Statistical analysis

We analyzed the longitudinal data of repeated measures of substance use at baseline (<28 weeks gestation) and at late pregnancy (34–36 weeks gestation) using Generalized Linear Mixed-effect Models (GLMMs). The longitudinal data analytical approach was capable of including all subjects in the intention-to-treat (ITT) analysis even when some subjects may have missing outcome values at either baseline or at late pregnancy, and the GLMMs can account for outcome data missing at random without the need to perform explicit imputations of the missing values.<sup>1</sup> The GLMMs include normal mixed-effect models for continuous outcomes, logistic mixed-effect models for binary outcomes, and Poisson mixed-effect models for count outcomes as special cases. The GLMMs are the most efficient and recommend statistical methods for analyzing longitudinal and clustered clinical trial data<sup>2</sup>, and have been widely used for conducting the ITT analysis of such trials with missing data.<sup>3</sup> We analyzed binary outcomes (cigarette smoking, alcohol, cannabis, street drug, and any substance use) using logistic mixed effect models and the count outcome (number of cigarettes smoked among smokers) using Poisson mixed effect models. For alcohol and street drugs, the logistic mixed effect models did not converge. Thus we fitted the binary outcomes using linear mixed effect models. This approach is acceptable for binary outcomes when there are sufficient degrees of freedom.<sup>3,4</sup>

These GLMMs incorporated the following predictor variables as fixed effects: 1) Time period (baseline versus late pregnancy) for time effects, 2) NFP intervention versus comparison for baseline group difference, and 3) Time period by NFP interaction. The effect of the intervention on the outcome variables at late pregnancy was taken as the Time period by NFP

Supplementary File  
Catherine et al., 2019.09.04 | Page 2 of 7

1  
2  
3  
4  
5  
6 interaction term. Thus, the longitudinal modeling approach has the advantage of examining  
7  
8 treatment effects via the difference-in-difference approach, which can account for group  
9  
10 differences in the outcomes at baseline.<sup>5</sup> Additionally, these models included random effects for  
11  
12 clusters (26 participating Local Health Areas [LHAs] within four health authorities [HAs] and  
13  
14 for 739 participants nested within these higher-level clusters) to account for random variations  
15  
16 among higher-level clusters and among participants within the same higher-level clusters. The  
17  
18 analysis showed that the clustering effects at the higher-level of LHA and HA were small with  
19  
20 variance components being statistically insignificant from zero. The Akaike information criterion  
21  
22 (AIC) statistic also supported the simpler models with random effects for participant only for  
23  
24 best fit. Thus, we reported results using the simpler two-level model with clustering at the  
25  
26 participant level. Model estimates (including the Time period by NFP interaction term for  
27  
28 treatment effect estimates), 95% confidence intervals (CIs) and the associated two-side p-values  
29  
30 were reported.  
31  
32  
33  
34  
35

36 To present treatment effects in terms of absolute risk (i.e., proportion), we estimated  
37  
38 proportions using estimated parameters from the fitted models. We calculated 95% confidence  
39  
40 intervals (CI) using the bootstrap method with 1,000 re-samples. These treatment effect estimates  
41  
42 at the scale of absolute risks were reported and compared with the crude difference-in-  
43  
44 differences, which was the difference in the crude (unadjusted) proportion of women who  
45  
46 reported substance use from baseline to late pregnancy.<sup>5</sup>  
47  
48

49 We conducted sensitivity analysis via selection models and computed the Index of Local  
50  
51 Sensitivity to Nonignorable missingness (ISNI) using the R package isni to assess the robustness  
52  
53  
54  
55  
56  
57  
58  
59  
60

of the results to the violation of missing at random assumptions.<sup>6</sup> We also conducted sensitivity analyses based on the above mixed effect models adjusting for baseline covariates (see Table 3).

To select relevant baseline covariates in the multivariable model for each outcome, we first run univariate analysis that relates each outcome to each baseline covariate in Table 3. Then we include all the baseline covariates with  $p < 0.10$  in the final multivariable model for each outcome with results reported in the last two columns of Table 5. All analyses were conducted using R 3.5.<sup>7</sup>

### **Sensitivity analysis on missing data assumptions**

Missing outcome data occurred mostly at the late pregnancy with 11.4% missing outcome values in NFP group and 9.7% in the comparison group (see Figure 1). Prior research has shown that the estimation results are robust to the violation of missing at random assumption, when missing data proportion is small ( $\leq 10\%$ ).<sup>8</sup> Thus with the small amount of missing data that are comparable in both groups in our trial, we anticipate that the ITT analyses conducted above should be insensitive to the assumption of data missing at random (MAR). To formally quantify the robustness of our ITT analyses to alternative missing data assumptions, we conducted the following analyses. Selection models were used that permit nonrandom missingness where the missingness probability depends on the unobserved outcome values after conditioning on the observed data and then we computed an Index of local Sensitivity to Nonignorable Missingness (ISNI).<sup>9,10,11</sup> ISNI estimates the change in ITT intervention effect estimates listed in the column “Treatment Effect” of Table 5 for a moderate size of nonrandom missingness where a participant with the binary outcome = Yes has an increase of  $e^1 = 2.7$ -fold in the odds of being missing relative to a participant with the outcome = No, given that both participants have the same values

Supplementary File  
Catherine et al., 2019.09.04 | Page 4 of 7

1  
2  
3  
4  
5  
6 of observed predictors for missingness. As reported in Table 7, the ISNI values were very small  
7  
8 relative to the ITT estimates assuming MAR for all substance use outcomes, demonstrating  
9  
10 negligible impacts of nonrandom missingness on the ITT estimates. As a result, it would require  
11  
12 extreme and unlikely scenarios for nonrandom missingness in order to change statistical  
13  
14 significance results, as shown by the large TP values in Table 7. For instance, a TP (tipping point  
15  
16 to change statistical significance result) value of -8.4 for cigarette use means an extreme scenario  
17  
18 such that a participant with cigarette use has an increase of  $e^{8.4}$ -fold ( $\approx 4447$ -fold) in the odds of  
19  
20 being observed relative to a participant without cigarette use and the same values on observed  
21  
22 predictors for missingness. A TP value of this large size is not meant to capture the exact tipping  
23  
24 point precisely, but merely means that one has to consider extreme cases of non-random  
25  
26 missingness to find sensitivity. Given the very small ISNI values and large TP values for all  
27  
28 substance use outcomes, we conclude the ITT estimation results are robust to the violation of the  
29  
30 MAR assumption.  
31  
32  
33  
34  
35  
36  
37  
38  
39  
40  
41  
42  
43  
44  
45  
46  
47  
48  
49  
50  
51  
52  
53  
54  
55  
56  
57  
58  
59  
60

**Table 7. Sensitivity analysis of the intention-to-treat treatment effect estimation to the assumption of missing at random**

|                       | ISNI    | Tipping Point (TP) |
|-----------------------|---------|--------------------|
| Cigarette (%)         | 0.05    | -8.4               |
| Alcohol (%)           | 0.00036 | -88.9              |
| Cannabis (%)          | 0.0097  | 146.4              |
| Street Drug (%)       | 0.00016 | -12.5              |
| Any Substance Use (%) | 0.0047  | -19.1              |

Note: ISNI (Index of Local Sensitivity to Nonignorability) estimates the change in ITT intervention effect estimates listed in the column “Treatment Effect” in Table 5 for a moderate size of nonrandom missingness where a participant with the binary outcome = Yes has an increase of  $e^1=2.7$ -fold in the odds of being missing relative to a participant with the outcome = No, given that both participants have the same values of observed predictors for missingness (baseline covariate values, visit dummy variables, randomization groups, LHA and HA, missingness status in prior visit); TP (Tipping Point) approximates the threshold size of nonrandom missingness required to change statistical significance results, where the size of nonrandom missingness is described by the log odds ratio of being missing for a participant with the outcome = Yes relative to a participant with the outcome = No and the same values on the aforementioned predictors for missingness.<sup>9,10,11</sup>

## Appendix 1 References

1. Diggle P, Heagerty P, Zeger S, Liang KY. *Analysis of Longitudinal Data*. Oxford, UK: Oxford University Press; 2013.
2. Gueorguieva R, Krystal JH. Move over ANOVA: Progress in analyzing repeated-measures data and its reflection in papers published in the Archives of General Psychiatry. *Arch Gen Psychiatry* 2004;61:310–17.
3. Leontjevas R, Gerritsen DI Smalbrugge M, et al. A structural multidisciplinary approach to depression management in nursing-home residents: A multicentre, stepped-wedge cluster-randomised trial. *Lancet* 2013;381:2255–64.
4. Hannan P, Murray D. Gauss or Bernoulli? A Monte Carlo comparison of the performance of the linear mixed-model and the logistic mixed-model analyses in simulated community trials with a dichotomous outcome variable at the individual level. *Eval Rev* 1996;20:338–52.
5. Meyer BD. Natural and quasi-experiments in economics. *J Bus Econ Stat* 1995;13:151–61.
6. Xie H, Gao W, Xing B, et al. Measuring the impact of nonignorable missingness using the R package isni. *Comput Methods Programs Biomed* 2018;164:207–20.
7. R Core Team. *R: A language and environment for statistical computing*. Vienna, Austria: R Foundation for Statistical Computing; 2018.
8. Xie H, Heitjan DF. Sensitivity analysis of causal inference in a clinical trial subject to crossover. *Clin Trials* 2004;1:21–30.
9. Ma G, Troxel AB, Heitjan D. An index of local sensitivity to nonignorable dropout in longitudinal modeling. *Stat Med* 2005;24:2129–50.
10. Xie H. A local sensitivity analysis approach to longitudinal non-Gaussian data with non-ignorable dropout. *Stat Med* 2008;27:3155–77.
11. Xie H, Qian Y. Measuring the impact of nonignorability in panel data with non-monotone nonresponse. *J App Econom* 2012;27:129–59.

## 2. Unanticipated problems

The British Columbia Healthy Connections Project (BCHCP) Data and Safety Monitoring Committee (DSMC) includes five independent members with experience and expertise in child health, maternal health, ethics, epidemiology and public health, including one clinician and one statistician. The purpose of the BCHCP DSMC is to safeguard the interests of the trial's participants, potential participants and investigators, and to monitor the trial's overall conduct, validity and credibility. Since the trial commenced in late 2013, no major protocol deviations or unanticipated problems have been reported for the BCHCP. An unanticipated problem is defined as any incident, experience or outcome (including an unanticipated serious adverse event) that meets all the following criteria:

- Unexpected regarding nature, severity or frequency given: a) the research procedures as described in the protocol-related documents; and b) the characteristics of the participant population being studied; and
- Related or possibly related to participation in the research (possibly related meaning there is a reasonable chance that the incident, experience or outcome may have been caused by the investigational intervention or by the research procedures); and
- Suggests that the research places participants or others at a greater risk of harm (including physical, mental, economic or social harm) than was previously known or recognized.
